# Supplementary material for: Research of Liquid-Crystal Materials for a High-Performance FFS-TFT Display
Source: MDPI journal article supplement (doi:10.3390/molecules28020754), 2023-01-11
Supplement: s1 [file s1]

# Support Information

## Research of Liquid-Crystal Materials for a High-Performance FFS-TFT Display

Haiguang Chen <sup>1,2,3</sup>, Youran Liu <sup>2,3</sup>, Maoxian Chen <sup>2,3</sup>, Tianmeng Jiang <sup>2,3</sup>, Lanying Zhang <sup>4</sup>, Zhou Yang <sup>1,\*</sup> and Huai Yang <sup>4,\*</sup>

- <sup>1</sup> School of Materials Science and Engineering, University of Science and Technology Beijing, Beijing 100083, China  
<sup>2</sup> Beijing Bayi Space Liquid Crystal Material Technology Company, Yangfang 102200, China  
<sup>3</sup> Beijing Key Laboratory of Liquid Crystal Materials Analysis and Application Technology, Beijing 102502, China  
<sup>4</sup> School of Materials Science and Engineering, Peking University, Beijing 100871, China  
\* Correspondence: yangz@ustb.edu.cn (Z.Y.); yanghuai@pku.edu.cn (H.Y.); Tel.: +86-01062333759 (Z.Y.); +86-010-62766919 (H.Y.)

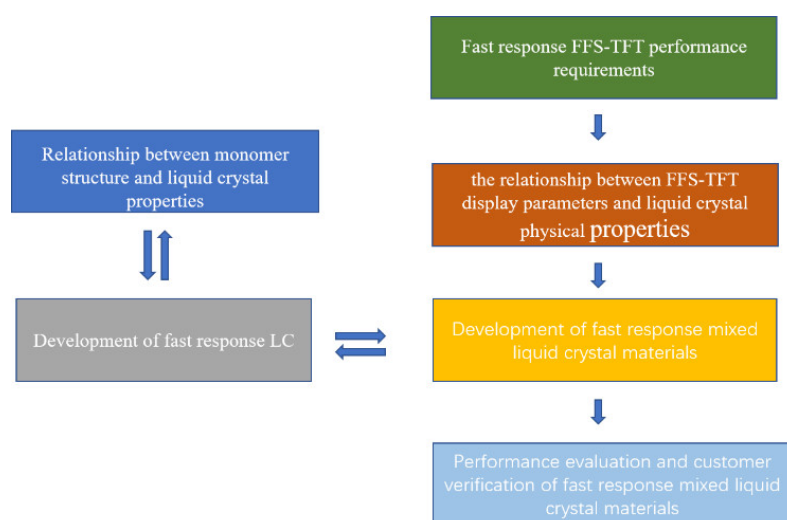

**Figure S1.** Technology Roadmap.

**Table S1.** Spec of Quality

| Liquid Crystal Property                                            |                              | Spec                   |
|--------------------------------------------------------------------|------------------------------|------------------------|
| Specific Resistivity [25°C]                                        | $\rho[\Omega\cdot\text{cm}]$ | $\geq 1\times 10^{13}$ |
| Specific Resistivity [25°C] After Heat 120°C, 2h                   | $\rho[\Omega\cdot\text{cm}]$ | $\geq 1\times 10^{12}$ |
| Resistivity [25°C] After UV 10000mW/cm <sup>2</sup>                | $\rho[\Omega\cdot\text{cm}]$ | $\geq 1\times 10^{12}$ |
| VHR [1V, 2s, 60°C]                                                 | (%)                          | $\geq 98.5\%$          |
| VHR [1V, 2s, 60°C] After UV 10000mW/cm <sup>2</sup>                | (%)                          | $\geq 98\%$            |
| Ion Density [1V, 0.01Hz, 60°C]                                     | PC                           | $\leq 50$              |
| Ion Density [1V, 0.01Hz, 60°C]<br>After UV 10000mW/cm <sup>2</sup> | PC                           | $\leq 100$             |
| Metallic ion                                                       | PPb                          | $\leq 20$              |

**Table S2.** Relationship between Structures and Performances of Liquid Crystal.

| Physical parameters | Adjustment   | Monomer structure                          |
|---------------------|--------------|--------------------------------------------|
| $\Delta\epsilon$    | $\uparrow$   | Dioxane, Linking group                     |
|                     | $\downarrow$ | Nonpolar terminal                          |
| $\Delta n$          | $\uparrow$   | Increase number of rings, Phenyl           |
|                     | $\downarrow$ | Cyclohexane, Dioxane                       |
| $T_{S-N}$           | $\uparrow$   | Linking group, F substitution              |
|                     | $\downarrow$ | Polycyclic                                 |
| $C_p$               | $\uparrow$   | Cyclohexane, Polycyclic, Long carbon chain |
|                     | $\downarrow$ | Phenyl                                     |
| $\gamma_1$          | $\uparrow$   | Cyclohexane, Long carbon chain             |
|                     | $\downarrow$ | Phenyl, Dioxane, Alkenyl linking group     |
| K11                 | $\uparrow$   | Cyclohexane, Polycyclic                    |
|                     | $\downarrow$ | Phenyl                                     |
| K22                 | $\uparrow$   | Cyclohexane, Polycyclic                    |
|                     | $\downarrow$ | Phenyl                                     |
| K33                 | $\uparrow$   | Cyclohexane, Polycyclic, Alkenyl           |
|                     | $\downarrow$ | Phenyl                                     |

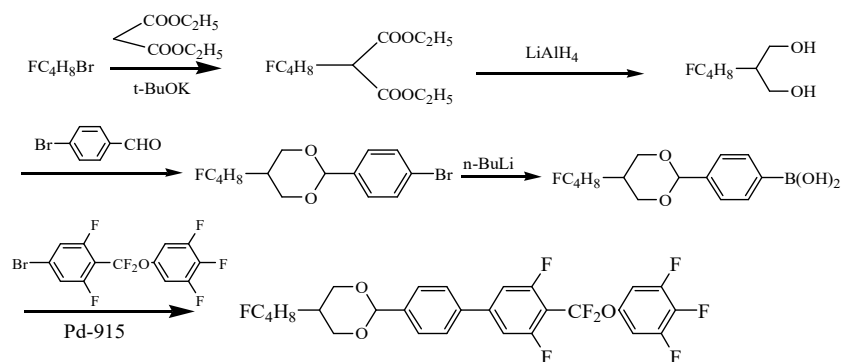

**Figure S2.** The synthesized route of the TFT liquid crystal compound.

**Table S3.** The contents of some metallic Ions

|    | BHR95300 |       |      |
|----|----------|-------|------|
| Na | 0        | Ni    | 0    |
| Mg | 0.02     | Cu    | 0.69 |
| Al | 0.02     | Zn    | 0    |
| K  | 0.13     | Sr    | 0    |
| Mn | 0        | Pd    | 0    |
| Fe | 0        | Sn    | 0.09 |
| Co | 0        | Total | 0.95 |
